# Supplementary material
Source: PubMed Central journal article supplement (PMC3218324)
Supplement: mmc1.pdf [file mmc1.pdf]

# SUPPORTING MATERIALS

## Improving Physical Realism and Structural Accuracy of Protein Models by a Two-step Atomic-level Energy Minimization

Dong Xu and Yang Zhang

**Table S1.** Training set of 262 “hard” proteins. Each protein name is represented by 4-letter PDB ID and 1-letter chain ID.

|       |       |       |       |       |       |       |       |       |       |
|-------|-------|-------|-------|-------|-------|-------|-------|-------|-------|
| 2gpiA | 1tifA | 1em8A | 1vbvA | 1pm4A | 1h9dB | 3eipA | 3doeB | 1kshB | 3feaA |
| 3di2A | 1b3tA | 2vlqB | 2qv8A | 2ia7A | 1vlsA | 1bjaA | 2ehpA | 3bt4A | 1ifrA |
| 2pk8A | 1bm8A | 1h05A | 4ubpB | 1ygtA | 1v74B | 1yozA | 1o6dA | 2gj2A | 1xvhA |
| 2sicI | 3cniA | 1szhA | 2v75A | 1h2cA | 1ozjA | 2nmmA | 2gtsA | 3bcyA | 3fxhA |
| 1x8yA | 1wddS | 1ztdA | 2rhkA | 2rh3A | 3eziA | 1k2xB | 1jwI  | 2p58C | 2ehwA |
| 2vqgA | 1bcpD | 2qffA | 1w1wE | 2hjmA | 2bcmA | 2oyyA | 2cu6A | 2o6kA | 3dt5A |
| 3d1mA | 3epvA | 2r19A | 3d33A | 1hxrA | 1p5vB | 2a7bA | 2gr8A | 2nrrA | 2endA |
| 2z1cA | 1yz1A | 1tuwA | 3dqgA | 2ai4A | 3bl2A | 2inwA | 1tulA | 3evyA | 3dtdA |
| 3fapB | 2o5hA | 1pucA | 2va0A | 2uubR | 2gnrA | 1fc3A | 3f6zB | 2qklB | 2gu3A |
| 1a1xA | 2iiaA | 1zvaA | 1z0pA | 3fyfA | 2vxgA | 3proC | 1mr1C | 1egwA | 2v11A |
| 2gmfA | 2fupA | 118dA | 1j27A | 2b3gA | 1zhsA | 1dszA | 3e0jB | 2pi2E | 2efvA |
| 2vt8A | 2z0tA | 3ejjA | 2qzbA | 2zkoA | 2huhA | 3c5oA | 2p9xA | 1z21A | 2z5bA |
| 2jbyA | 1r0uA | 2v1tA | 2gmqA | 1171A | 3by7A | 2bzvA | 1vj1A | 3db3A | 2od5A |
| 3c5xC | 1nz0A | 2qq4A | 2vh3A | 3encA | 1f32A | 2rdcA | 2hw2A | 1zbxB | 2rbgA |
| 2ga1A | 3dcxA | 2rjiA | 1z8uA | 1hekA | 2v89A | 3dnxA | 2v3sA | 1ahsA | 3c1qA |
| 3ebqA | 1zt3A | 1usuB | 2bn1A | 2yskA | 2dm9A | 3f59A | 1zpsA | 2iihA | 1qqrA |
| 2ahmA | 3bxuA | 2qzqA | 1s4cA | 3fgxA | 3f62A | 2fztA | 2gujA | 1g2rA | 1nigA |
| 1gvpA | 3c8iA | 1vsrA | 2ebeA | 3be3A | 3eoiA | 3facA | 3fxtA | 1jg5A | 2w0gA |
| 1uj8A | 3cqxC | 3fkeA | 1wnaA | 2dstA | 1y91A | 2dpfA | 2o9uX | 1g4yB | 2qziA |
| 2r2cA | 3c9pA | 3bypA | 1wjxA | 1f46A | 2zfdB | 3esmA | 1t3uA | 2b8iA | 2ccqA |
| 1osyA | 2oy9A | 1regX | 3fbiB | 1cmcA | 3e0zA | 1ujwB | 3e9vA | 1lj2A | 110sA |
| 1thqA | 3fb9A | 1gd8A | 1y0nA | 2hc8A | 1oz9A | 1sedA | 1a62A | 1i8nA | 2o0qA |
| 3d0wA | 1eteA | 2oszA | 1q8dA | 1m5iA | 1u2mA | 3dnjA | 1zldA | 1ed1A | 2mcmA |
| 2dbsA | 1efnB | 3e11A | 1whiA | 3g73A | 1hcnB | 2hu9A | 3bqaA | 1xg8A | 11m8V |
| 1q5zA | 3bp3A | 2opeA | 2fomB | 2es9A | 2fufA | 1wv8A | 2qlcA | 1v2zA | 2qudA |
| 1k8rB | 1lktA | 2gagD | 3d4uB | 3dfdA | 2f6mB | 1zs4A | 1e44B | 1vqo3 | 2vlqA |
| 2hd0A | 1ezjA |       |       |       |       |       |       |       |       |

**Table S2.** Testing set of 148 “hard” proteins. Each protein name is represented by 4-letter PDB ID and 1-letter chain ID.

|       |       |       |       |       |       |       |       |       |       |
|-------|-------|-------|-------|-------|-------|-------|-------|-------|-------|
| 3chbD | 1wn2A | 1ykuA | 1wxcB | 1ufyA | 2ofcA | 2covD | 2j9wA | 1t6uA | 2fewA |
| 2nmlA | 1kafA | 2ip6A | 1j3wA | 1nlqA | 2chhA | 1mn8A | 2jekA | 1n8vA | 1u84A |
| 2v33A | 1w53A | 1ugiA | 1o82A | 1ok0A | 1ka8A | 1xzqB | 1prtF | 1prtD | 1oczE |
| 2r41D | 1xpxA | 1jc7A | 2bseA | 2fioB | 1h4ID | 1cf7B | 2o26A | 1hl6D | 2d5rB |
| 2j4bB | 1jsgA | 2hdiB | 2bhmA | 2pt7G | 2yx8A | 1cqaA | 2gjvA | 2e79A | 1qynD |
| 2gwfB | 1smpI | 1e2aA | 2qvtA | 2g38C | 1qc7A | 1b4bA | 1v1jA | 2bl7A | 1im3D |
| 1bg8A | 2qyaA | 1ipiA | 1k3bA | 2rcfB | 2fu2A | 1j1vA | 1xeqA | 2qm2B | 3bjoA |
| 2h5nD | 1pzwA | 1r7lB | 1y96B | 2czvD | 2b91A | 1lddA | 2gy9K | 2gybT | 2gy9Q |
| 1nzeA | 1y71B | 2o4tA | 2v94B | 1stmA | 1r75A | 1mwpA | 1v54H | 2igpA | 2fygA |
| 2oq8A | 1kvdB | 1kp6A | 1r77B | 2j97A | 1kptA | 1tsfA | 2e12A | 2f5gA | 2hl7A |
| 1t1jB | 2oqbB | 1yo3A | 1dj7A | 1vccA | 2d68B | 1zkeA | 2ciuA | 3bs1A | 1g8qA |
| 1rkiA | 2aydA | 1t92A | 2q3tA | 2czsA | 1jr8A | 1lmiA | 1dp7P | 1vyiA | 1wpuA |
| 1xawA | 1bgfA | 2hewF | 2ohwA | 1n13B | 1mc2A | 2b97A | 2vb1A | 1jo0A | 1wckA |
| 1ijyA | 1vmhA | 2qt7A | 2j6bA | 2qsbA | 1nqjB | 2bt9A | 2h8eA | 1vr7A | 2fhzA |
| 2fhzB | 1sauA | 1uz3A | 2axwA | 1lwbA | 1i27A | 2aibA | 1c5eA |       |       |

**Table S3.** Testing set of 113 “easy” proteins. Each protein name is represented by 4-letter PDB ID and 1-letter chain ID.

|       |       |       |       |       |       |       |       |       |       |
|-------|-------|-------|-------|-------|-------|-------|-------|-------|-------|
| 1b0xA | 3f75P | 1gyyA | 1sfuA | 2vb2X | 1obxA | 1scjB | 2pneA | 2p2rA | 2q5wD |
| 3cjsB | 1nlwB | 2eboA | 2utgA | 3bs9A | 3b5nC | 1dokA | 2z4pA | 1iqzA | 2ec9T |
| 1l0hA | 2qbvA | 1wm2A | 1jq0A | 1h75A | 2fq3A | 1ucrB | 2guzA | 2pmrA | 1ljoA |
| 1n1jB | 1l9lA | 3bs7A | 2oo2A | 1wz3A | 2o30A | 1v5iB | 1xmKA | 3bktA | 2o2vB |
| 1fipA | 1c75A | 2evbA | 1eptB | 3b7hA | 1pufA | 3htsB | 1dgwX | 3e19C | 1ybzA |
| 2uwjE | 2hueB | 2bkfA | 1uw4A | 1d3bE | 1bt0A | 1tafB | 2z3rB | 1zpvC | 1pk3C |
| 1guaB | 2ek1D | 3bs5B | 2bv2A | 1f60B | 1vmgA | 1g33A | 1wlzA | 1nfjA | 1krnA |
| 2zeqA | 2qvoA | 2vc8A | 1r8oB | 1na3A | 2fazA | 1wmhA | 1y96A | 1c53A | 2nzcB |
| 3f6qB | 2hzcA | 2ckxA | 2vs0B | 1x6jA | 3cecA | 2ieqB | 1i81A | 2o49A | 2o1rA |
| 2icpA | 3cu4A | 1a68A | 2ca3B | 2zboA | 2eaqA | 1ynrA | 1kwaA | 3eusA | 2i6vA |
| 3d1mD | 1cxyA | 1luzA | 2obpA | 3bqqA | 1wveC | 2r2zA | 2pliA | 2bf3A | 3cjkB |
| 3fojA | 1oeyA | 2h61B |       |       |       |       |       |       |       |

**Table S4.** Comparison of structural relaxation results by different versions of Rosetta programs. Each bold number is the best performance at each category.

|                 |               | <b>RMSD</b>   | <b>TM-score</b> | <b>GDT-TS</b> | <b>GDT-HA</b> | <b>GDT-SC</b> | <b>HMA</b>   | <b>HMC</b>   | <b>HSA</b>   | <b>HSC</b>   |
|-----------------|---------------|---------------|-----------------|---------------|---------------|---------------|--------------|--------------|--------------|--------------|
| Rosetta decoys  | Rosetta2.3.0  | 10.48Å        | <b>0.386</b>    | 40.60         | 27.54         | 10.25         | 0.585        | <b>0.523</b> | <b>0.171</b> | <b>0.087</b> |
|                 | Rosetta3.2.1a | <b>10.42Å</b> | <b>0.386</b>    | 40.63         | 27.54         | 10.14         | 0.590        | 0.518        | 0.137        | 0.082        |
|                 | Rosetta3.2.1b | 10.44Å        | <b>0.386</b>    | 40.63         | 27.60         | 10.18         | 0.594        | 0.520        | 0.141        | 0.079        |
|                 | Rosetta3.2.1c | 10.47Å        | <b>0.386</b>    | <b>40.64</b>  | <b>27.73</b>  | <b>10.36</b>  | <b>0.595</b> | 0.516        | 0.144        | 0.081        |
| I-Tasser decoys | Rosetta2.3.0  | 7.85Å         | <b>0.526</b>    | <b>53.44</b>  | <b>38.06</b>  | <b>17.99</b>  | 0.670        | <b>0.546</b> | <b>0.205</b> | <b>0.099</b> |
|                 | Rosetta3.2.1a | <b>7.75Å</b>  | 0.523           | 53.16         | 37.65         | 17.74         | 0.668        | 0.539        | 0.151        | 0.090        |
|                 | Rosetta3.2.1b | 7.80Å         | 0.525           | 53.37         | 38.02         | 17.73         | <b>0.680</b> | 0.542        | 0.152        | 0.082        |
|                 | Rosetta3.2.1c | 7.91Å         | 0.524           | 53.22         | 37.89         | 17.80         | 0.678        | 0.540        | 0.159        | 0.087        |

**Table S5.** Command lines for the four different Rosetta relaxation programs.

| Rosetta programs | Command lines                                                                                                             |
|------------------|---------------------------------------------------------------------------------------------------------------------------|
| Rosetta2.3.0     | <code>./rosetta.release aa 1xxx A -relax -farlx -s initfull -fa_input -fa_output -ex1 -ex2</code>                         |
| Rosetta3.2.1a    | <code>./relax.linuxgccrelease -database rosetta_database -in:file:s initfull.pdb -in:file:fullatom -relax:thorough</code> |
| Rosetta3.2.1b    | <code>./relax.linuxgccrelease -database rosetta_database -in:file:s initfull.pdb -in:file:fullatom -relax:fast</code>     |
| Rosetta3.2.1c    | <code>./relax.linuxgccrelease -database rosetta_database -in:file:s initfull.pdb -in:file:fullatom -relax:quick</code>    |

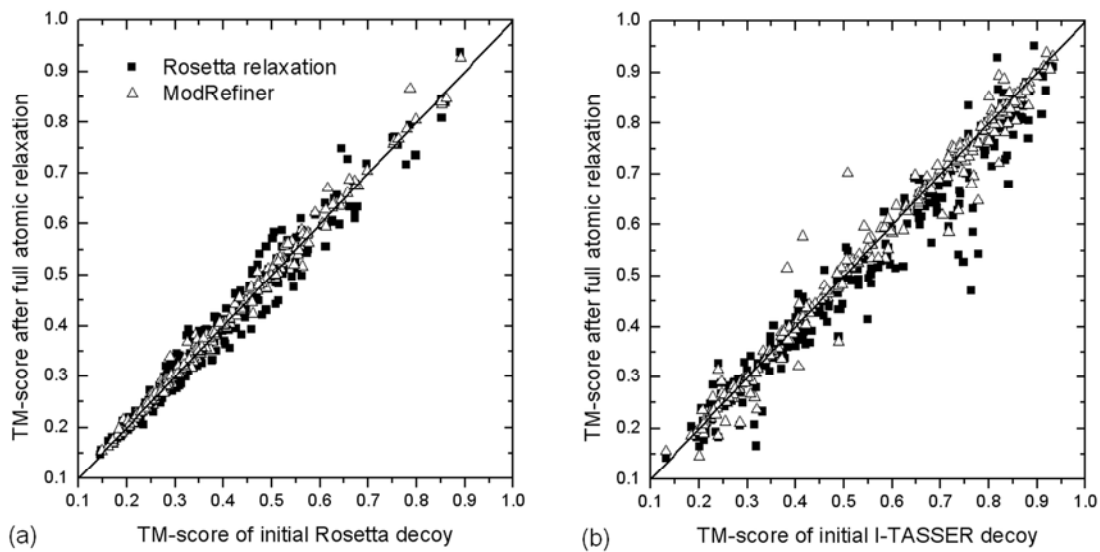

**Figure S1.** TM-score comparison of ModRefiner and Rosetta relaxation models with initial models generated by (a) Rosetta and (b) I-TASSER.
